# Supplementary material for: Development of high-performance bi-functional novel CdSnS2 atom clusters for adsorption of rose Bengal and AOP-assisted degradation of methylene blue
Source: Royal Society of Chemistry journal article supplement (doi:10.1039/d2ew00654e), 2022-12-23
Supplement: d2ew00654e1.pdf [file d2ew00654e1.pdf]

Electronic Supplementary Information

**Development of high-performance novel CdSnS<sub>2</sub> atom cluster for adsorption of Royal  
Bengal and AOP-assisted degradation of Methylene Blue**

Soumya Ranjan Mishra, Vishal Gadore, Md. Ahmaruzzaman\*

Department of Chemistry, National Institute of Technology, Silchar, Assam, India

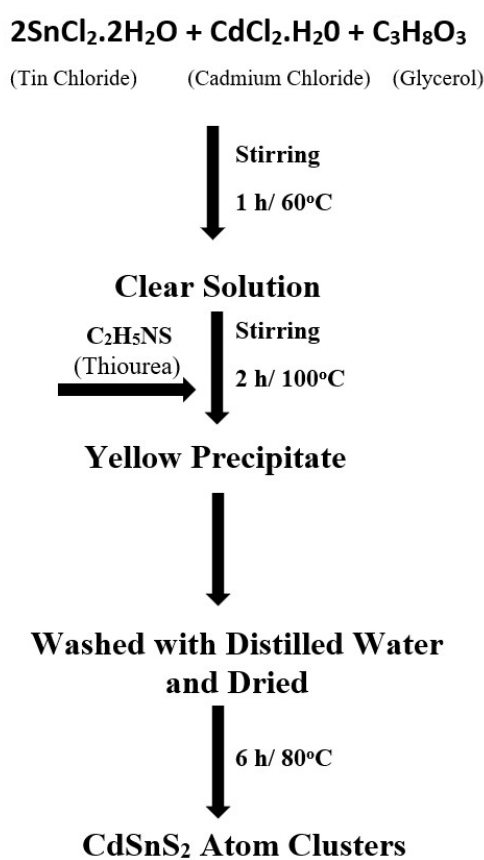

Figure S1: Schematic illustration of the fabrication of CdSnS<sub>2</sub> atom clusters

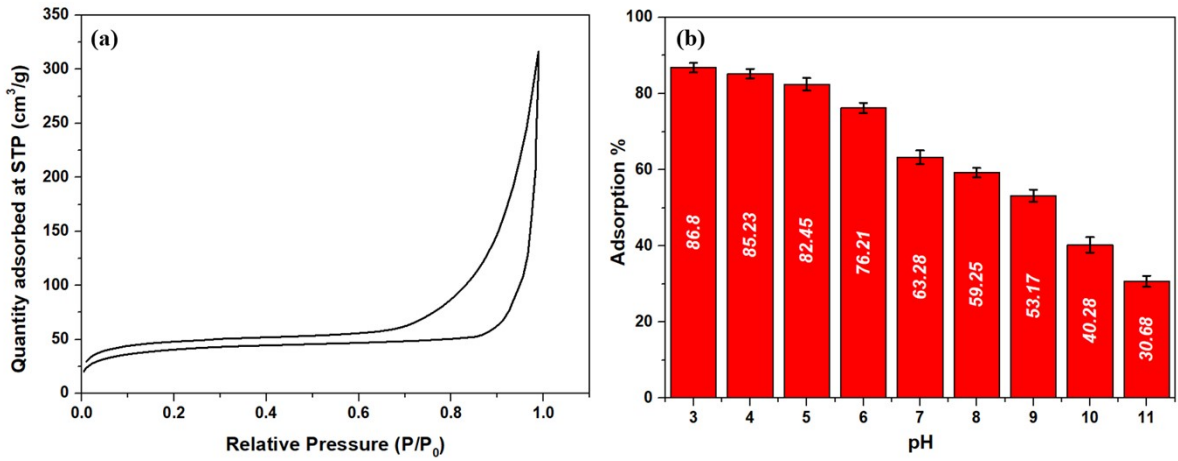

Figure S2: a) Nitrogen desorption/adsorption isotherm b) Effect of pH on the adsorption of RB.

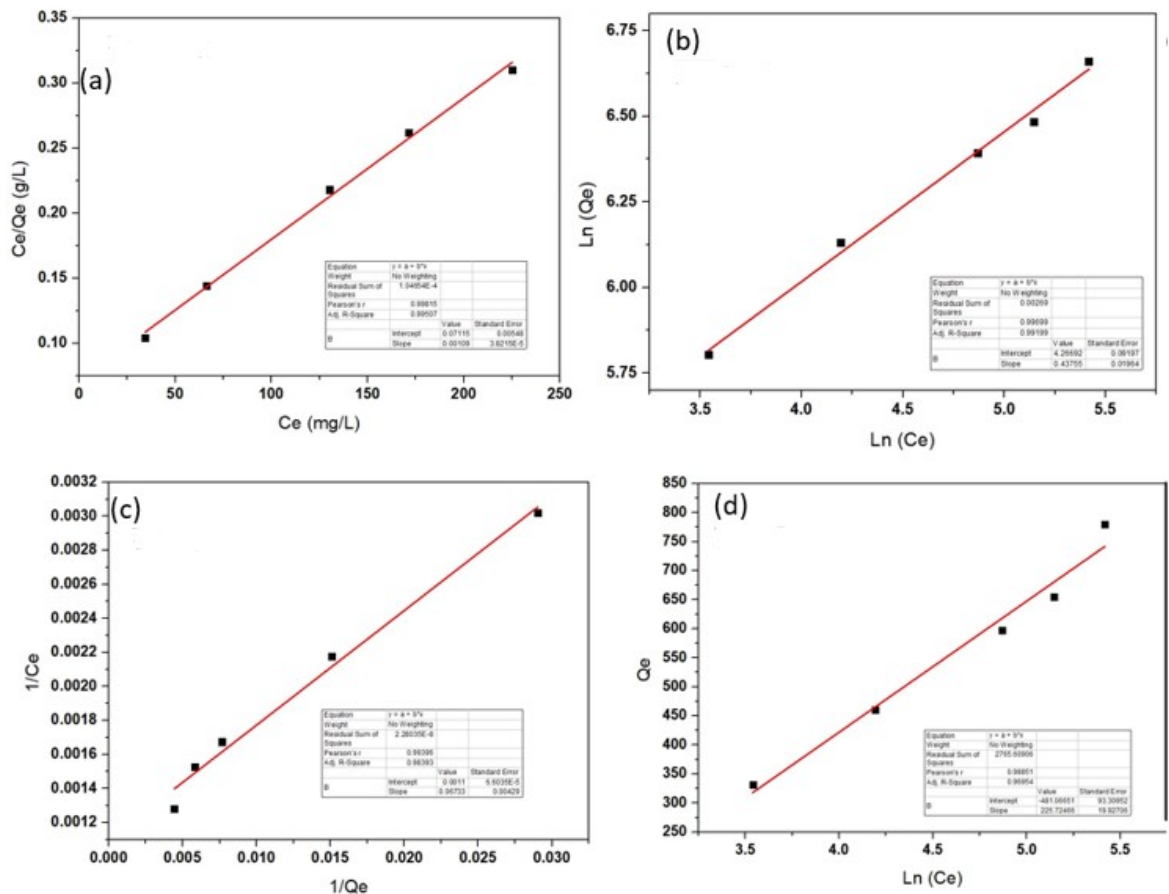

Figure S3: Adsorption isotherm plots of a) Langmuir, b) Freundlich, c) Lineweaver-Burk, and d) Temkin

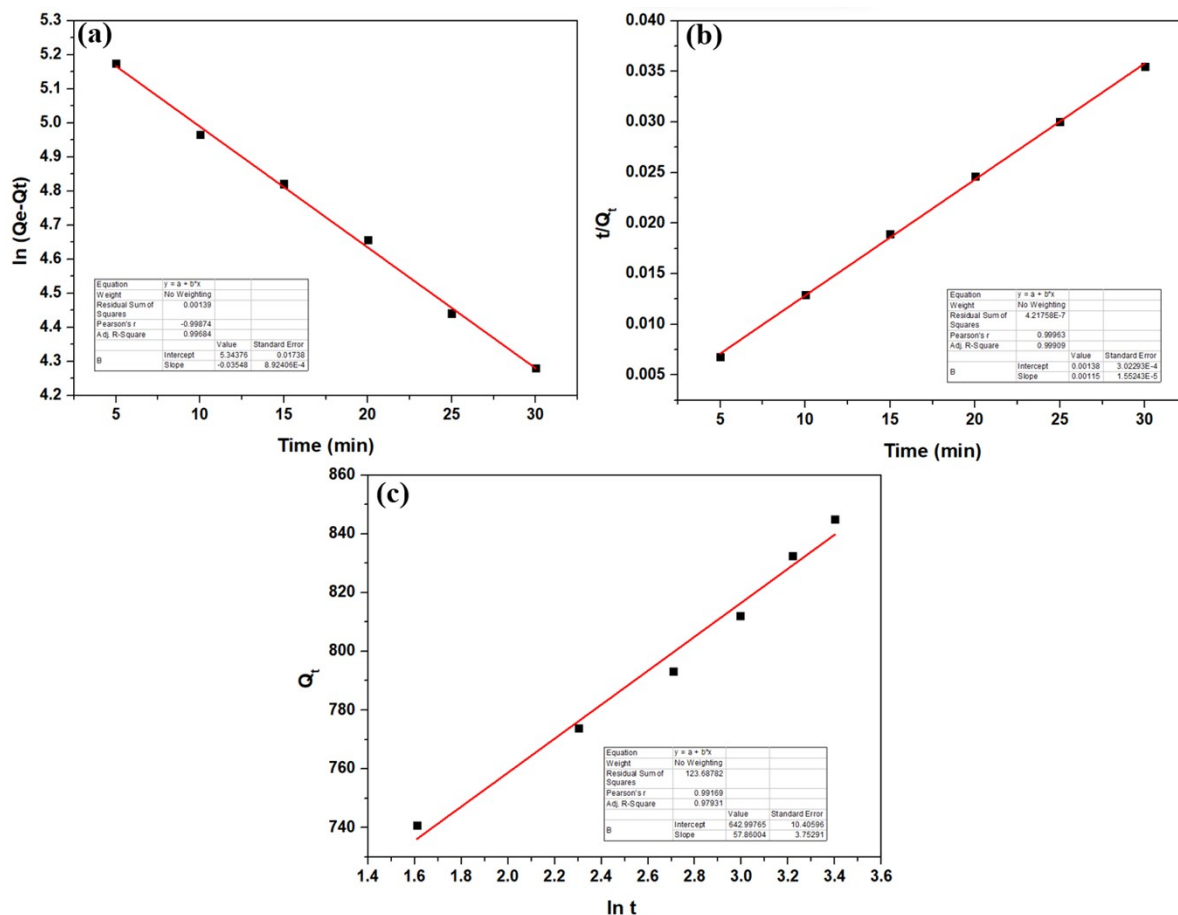

Figure S4: Plots showing a) pseudo-first-order, b) pseudo-second-order, c) Elovich kinetics models

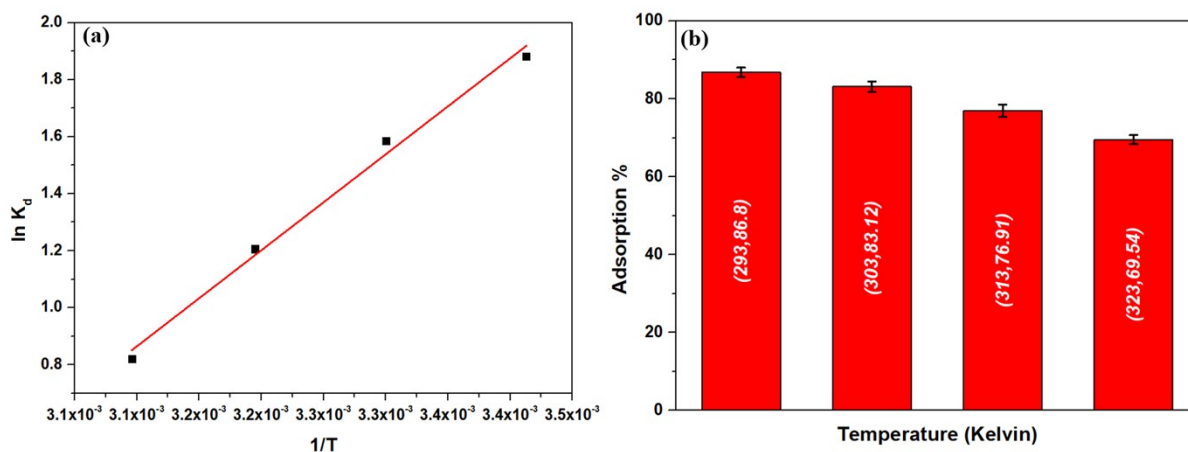

Figure S5: a) Vant Hoff's plot for the removal of RB b) Role of temperature on the removal of RB

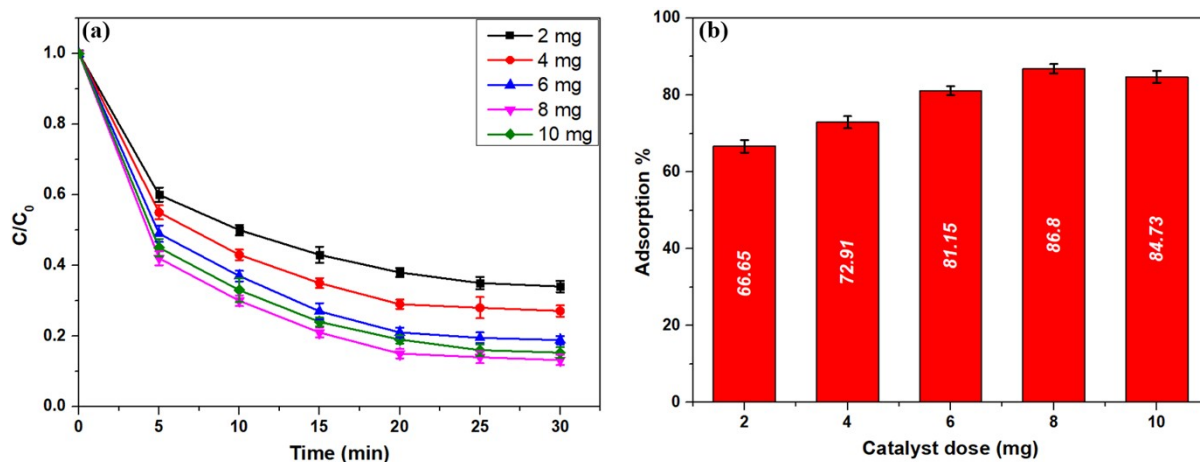

Figure S6: a) Effect of nanocomposite dose and b) Adsorption percentage of CdSnS<sub>2</sub> atom clusters on the removal of RB.

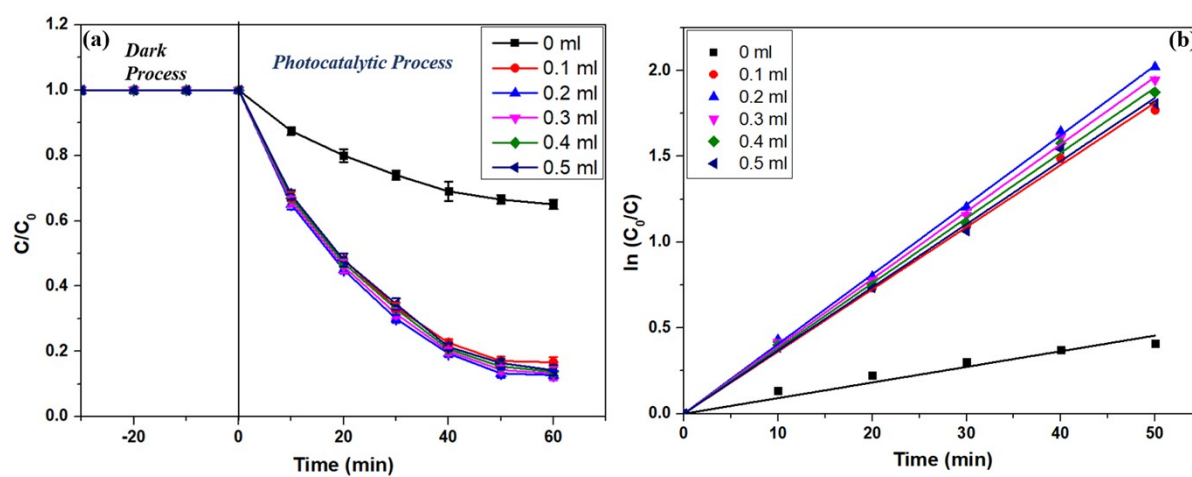

Figure S7: a) The photodegradation performance of MB and b) Kinetics at varying H<sub>2</sub>O<sub>2</sub> dosage

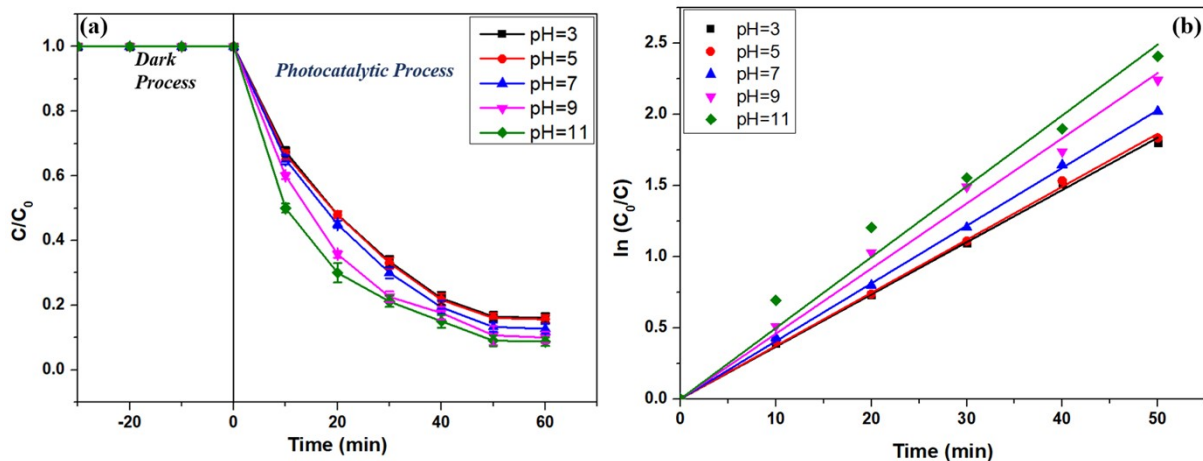

Figure S8: a) The photodegradation performance of MB and b) Kinetics at varying pH

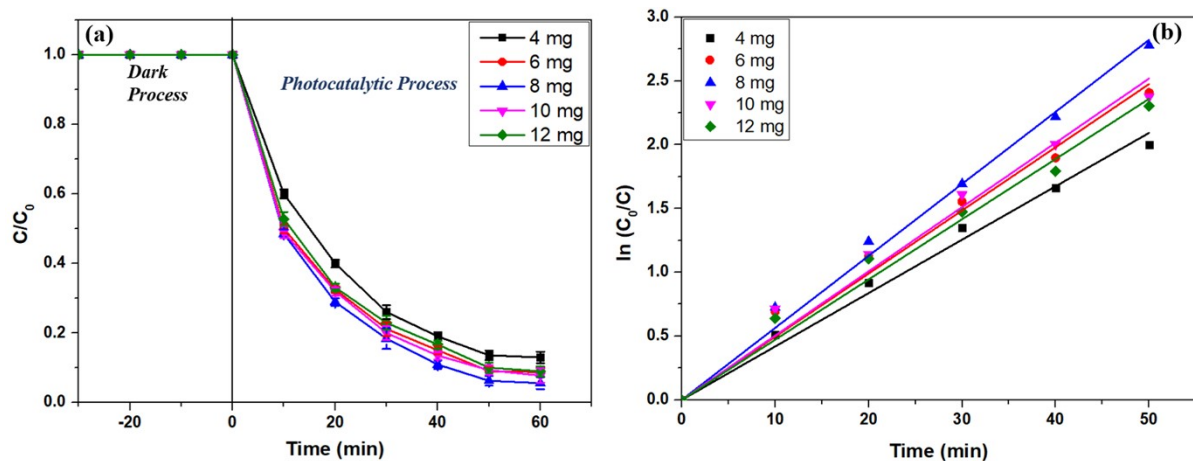

Figure S9: a) The photodegradation performance of MB and b) Kinetics at varying catalyst dosage

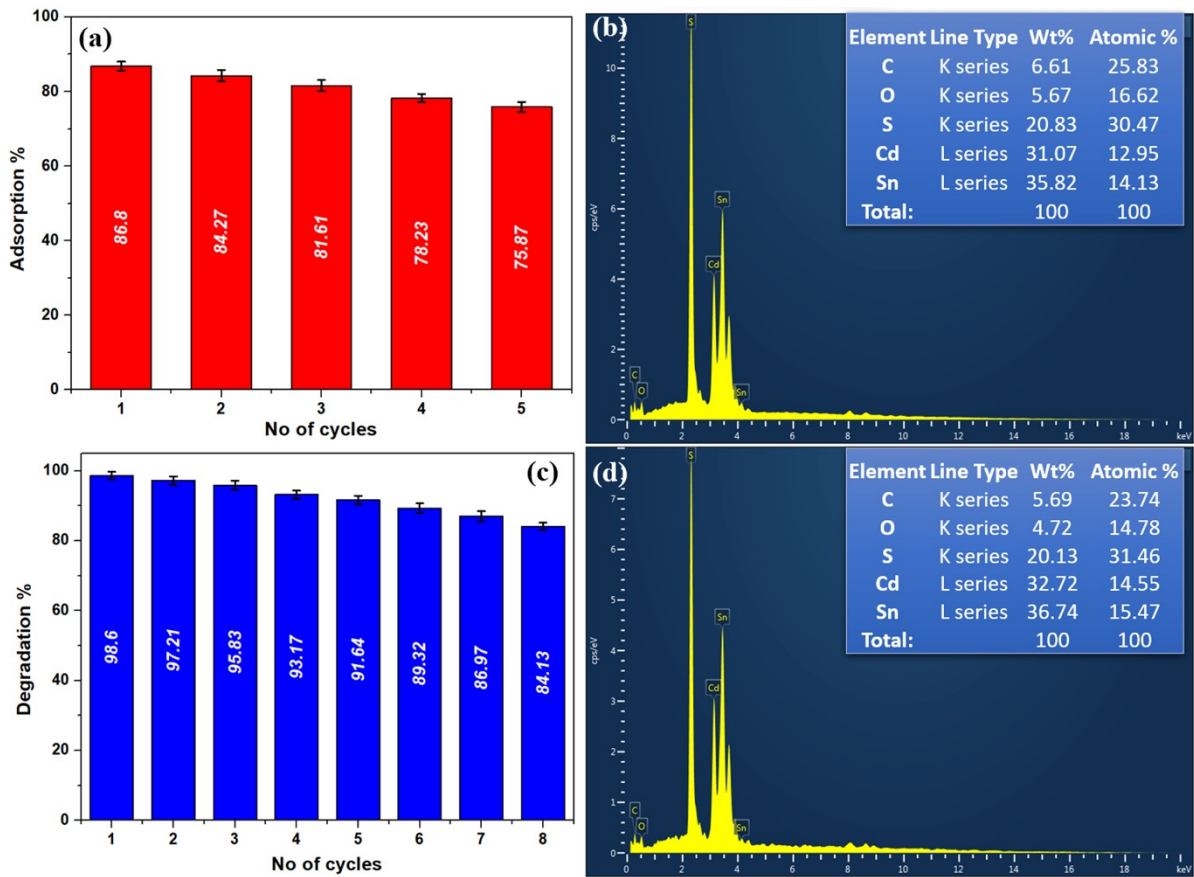

Figure S10: Reusability studies of CdSnS<sub>2</sub> atom clusters for a) adsorption of RB and c) degradation of MB; EDAX analysis after b) 5 cycles adsorption of RB and d) 8 cycles degradation of MB

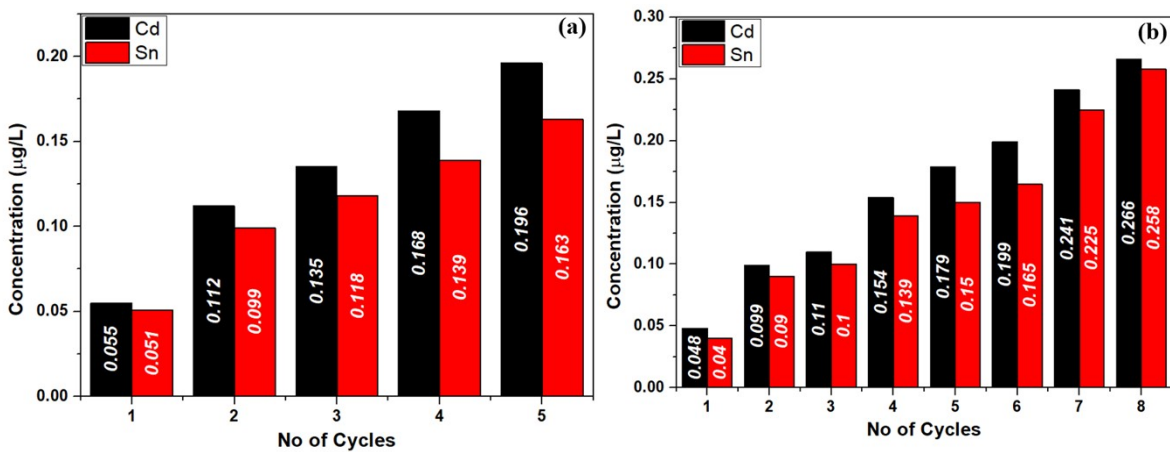

S11: Concentration of Cadmium and Stannum in wastewater after a) adsorption of RB b) degradation of MB

Table S1: Comparison of various kinetic models

| Kinetic model       | Linear equation                                                    | Correlation coefficient (R <sup>2</sup> ) |
|---------------------|--------------------------------------------------------------------|-------------------------------------------|
| Pseudo-first-order  | $\ln(Q_e - Q_t) = \ln Q_e - k_1 t$                                 | 0.9968                                    |
| Pseudo-second-order | $\frac{t}{Q_t} = \frac{1}{k_2 Q_e^2} + \frac{1}{Q_e} t$            | 0.999                                     |
| Elovich             | $Q_t = \frac{1}{\alpha} \ln(\alpha\beta) + \frac{1}{\alpha} \ln t$ | 0.9793                                    |

Table S2: The degradation performance of MB at varying H<sub>2</sub>O<sub>2</sub> dosage

| Peroxide dosage/50 ml | Degradation percentage (%) | Rate constant (min <sup>-1</sup> ) | R <sup>2</sup> |
|-----------------------|----------------------------|------------------------------------|----------------|
| 0 ml                  | 35.04 ± 1.42               | 0.0091                             | 0.983          |
| 0.1 ml                | 83.35 ± 1.54               | 0.03625                            | 0.9992         |
| 0.2 ml                | 87.31 ± 1.47               | 0.04058                            | 0.9998         |
| 0.3 ml                | 86.8 ± 2.02                | 0.03926                            | 0.9995         |
| 0.4 ml                | 86.32 ± 1.43               | 0.038                              | 0.9992         |
| 0.5 ml                | 85.79 ± 1.57               | 0.03682                            | 0.9987         |

Table S3: The degradation performance of MB at varying pH

| pH | Degradation percentage (%) | Rate constant (min <sup>-1</sup> ) | R <sup>2</sup> |
|----|----------------------------|------------------------------------|----------------|
| 3  | 83.95 ± 1.49               | 0.03671                            | 0.9994         |
| 5  | 84.41 ± 1.28               | 0.03727                            | 0.9993         |
| 7  | 87.31 ± 1.47               | 0.04058                            | 0.9998         |
| 9  | 90.05 ± 1.73               | 0.04579                            | 0.9958         |
| 11 | 91.27 ± 1.33               | 0.04979                            | 0.9912         |

Table S4: The degradation performance of MB at varying catalyst dosage

| Catalyst dose | Degradation percentage (%) | Rate constant (min <sup>-1</sup> ) | R <sup>2</sup> |
|---------------|----------------------------|------------------------------------|----------------|
| 4 mg          | 87.07 ± 1.68               | 0.04185                            | 0.9959         |
| 6 mg          | 91.27 ± 1.33               | 0.04979                            | 0.9912         |
| 8 mg          | 94.43 ± 1.72               | 0.05643                            | 0.9971         |
| 10 mg         | 92.26 ± 2.02               | 0.05038                            | 0.9921         |
| 12 mg         | 91.05 ± 1.46               | 0.04719                            | 0.9932         |
